# Supplementary material
Source: MDPI journal article supplement (https://www.mdpi.com/2673-8007/4/1/12)
Supplement: s1 [file s1]

Supplementary information of:

**METHANOGENIC ARCHAEA QUANTIFICATION IN THE HUMAN GUT  
MICROBIOME WITH F<sub>420</sub> AUTOFLUORESCENCE BASED FLOW CYTOMETRY**

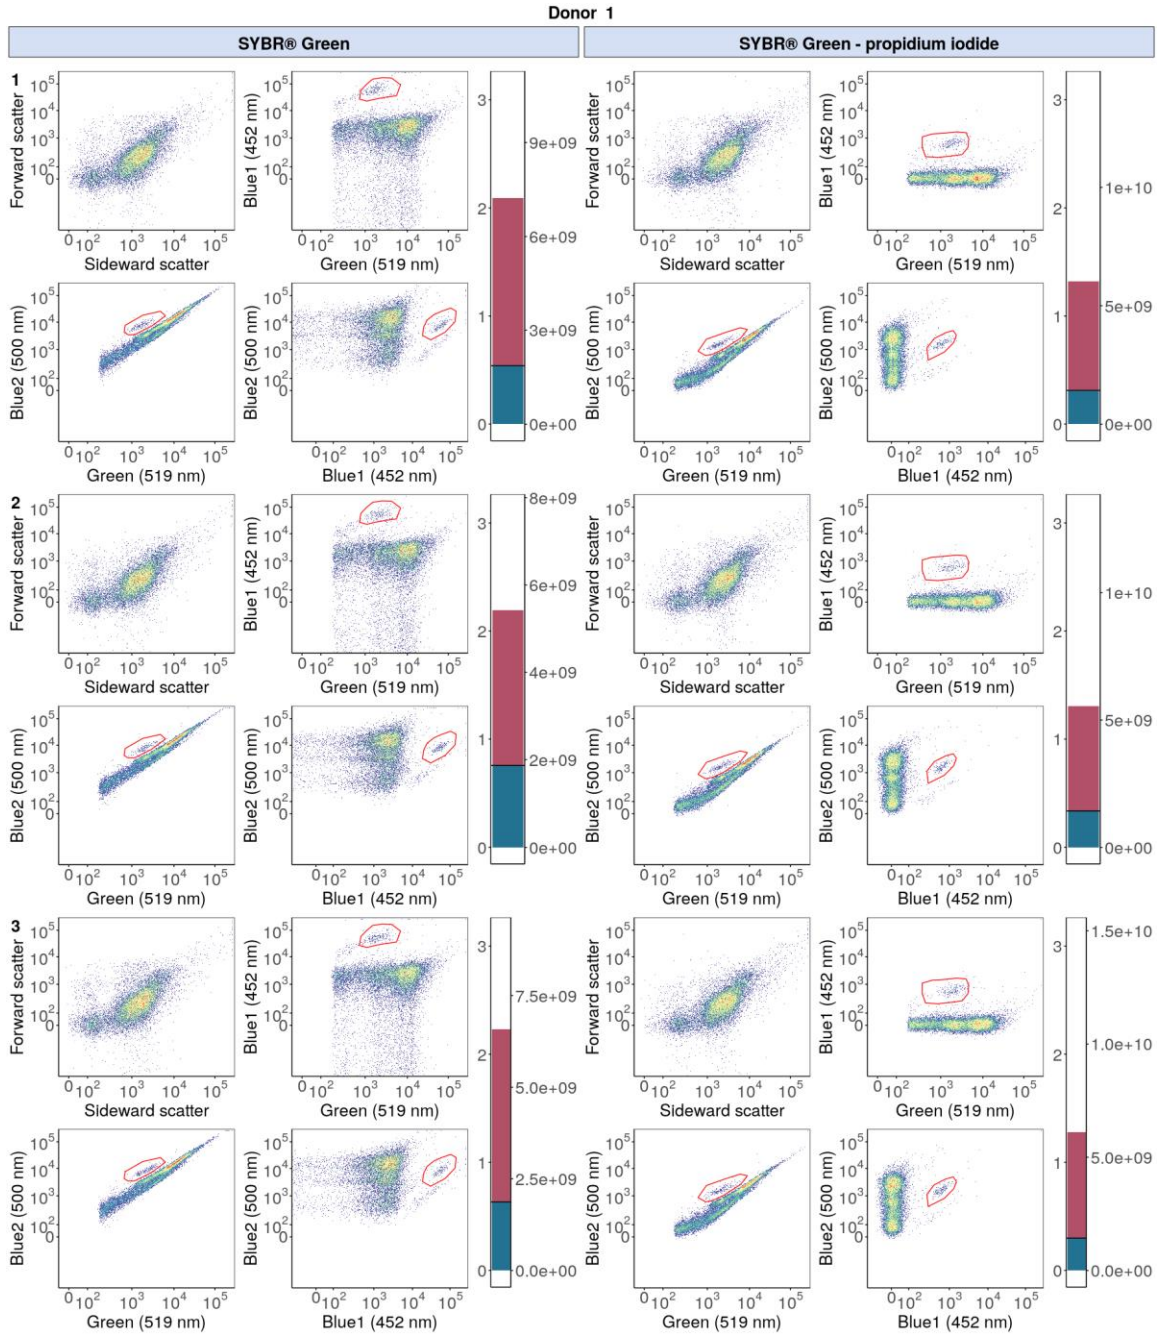

Figure S1: Visualisation of cofactor  $F_{420}$  auto fluorescence (gated in red) in Blue1 (452 nm) and Blue2 (500 nm) fluorescence channels as a function of the Green (519 nm) fluorescence channels, Blue2 fluorescence as a function of the Blue1 fluorescence channels and the microbial community visualisation in the forward scatter as a function of the sideways scatter channels of technical replicates of a faecal sample derived from donor 1. The replicates were stained with either SYBR® Green (left) or a SYBR® Green – propidium iodide staining mix (right). The proportional (left y-axis) and absolute (right y-axis) cell counts are depicted as a bar chart on the right, with the detected methanogen population in the filtered sample depicted as a horizontal line. The absolute methanogen population below and above the filtered sample population is depicted in blue and red, respectively.

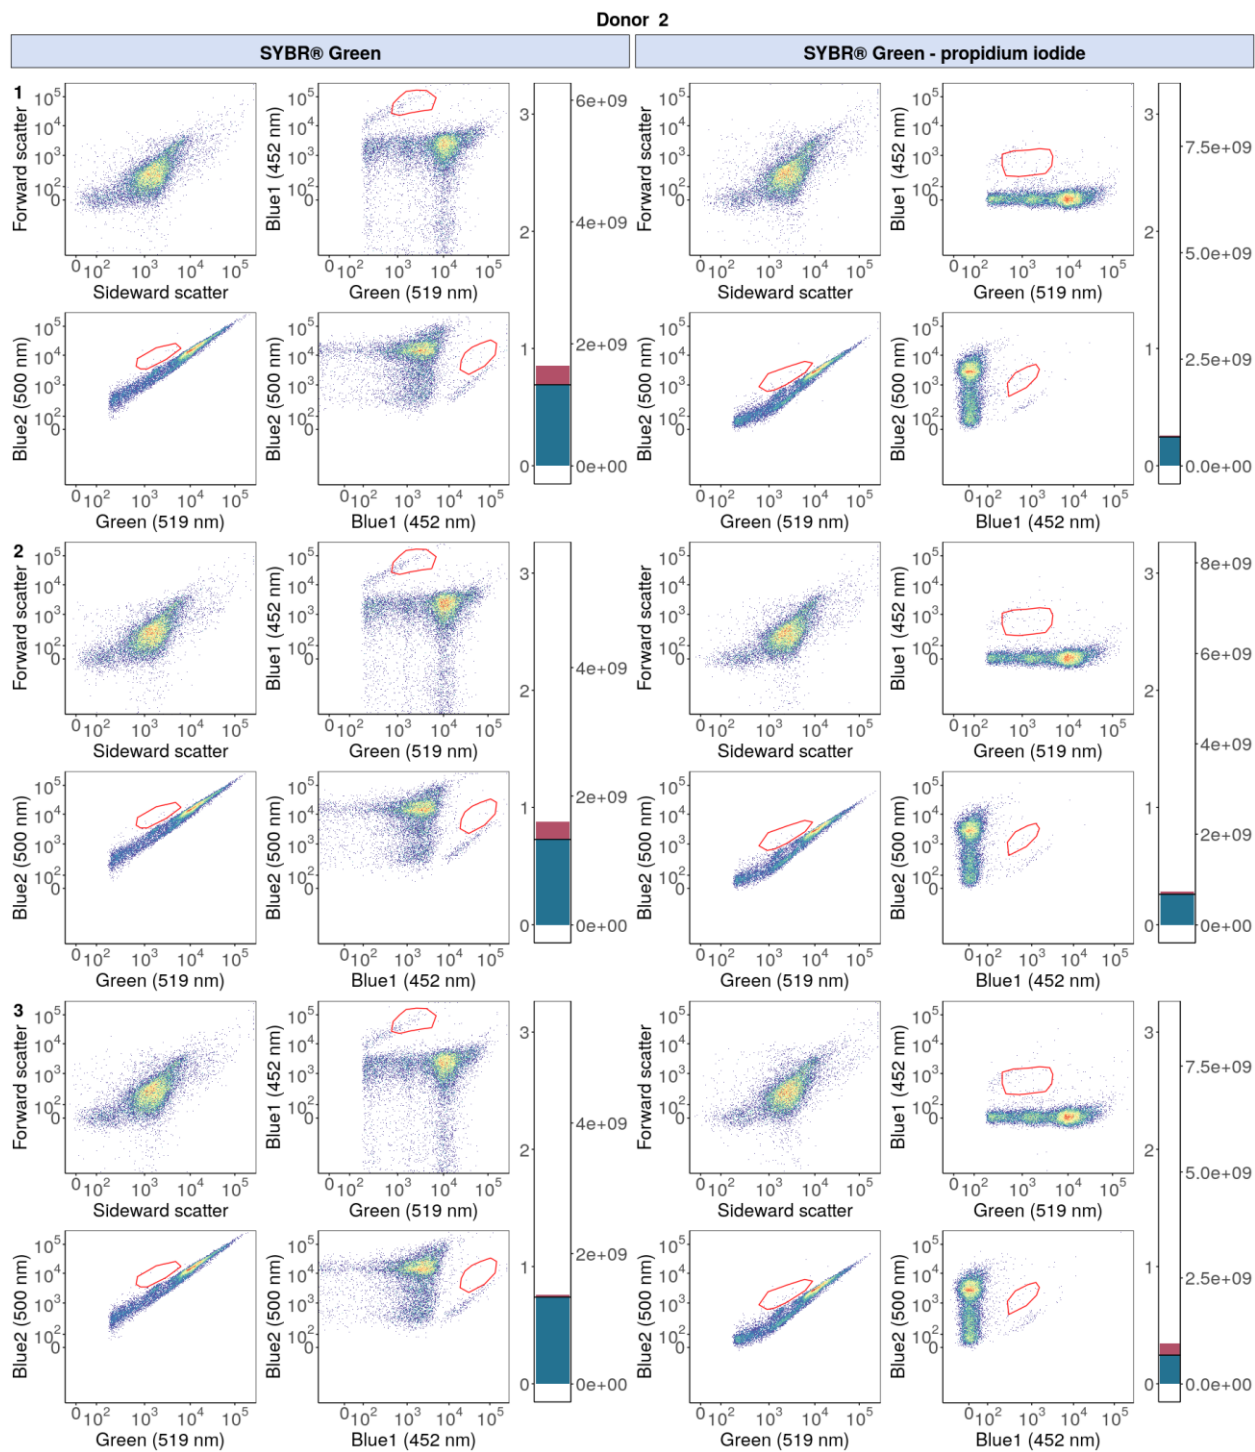

Figure S1 - continued: Visualisation of cofactor  $F_{420}$  auto fluorescence (gated in red) in Blue1 (452 nm) and Blue2 (500 nm) fluorescence channels as a function of the Green (519 nm) fluorescence channels, Blue2 fluorescence as a function of the Blue1 fluorescence channels and the microbial community visualisation in the forward scatter as a function of the sideways scatter channels of technical replicates of a faecal sample derived from donor 2. The replicates were stained with either SYBR® Green (left) or a SYBR® Green – propidium iodide staining mix (right). The proportional (left y-axis) and absolute (right y-axis) cell counts are depicted as a bar chart on the right, with the LOD depicted as a horizontal line. The absolute methanogen population below and above the filtered sample population is depicted in blue and red, respectively.

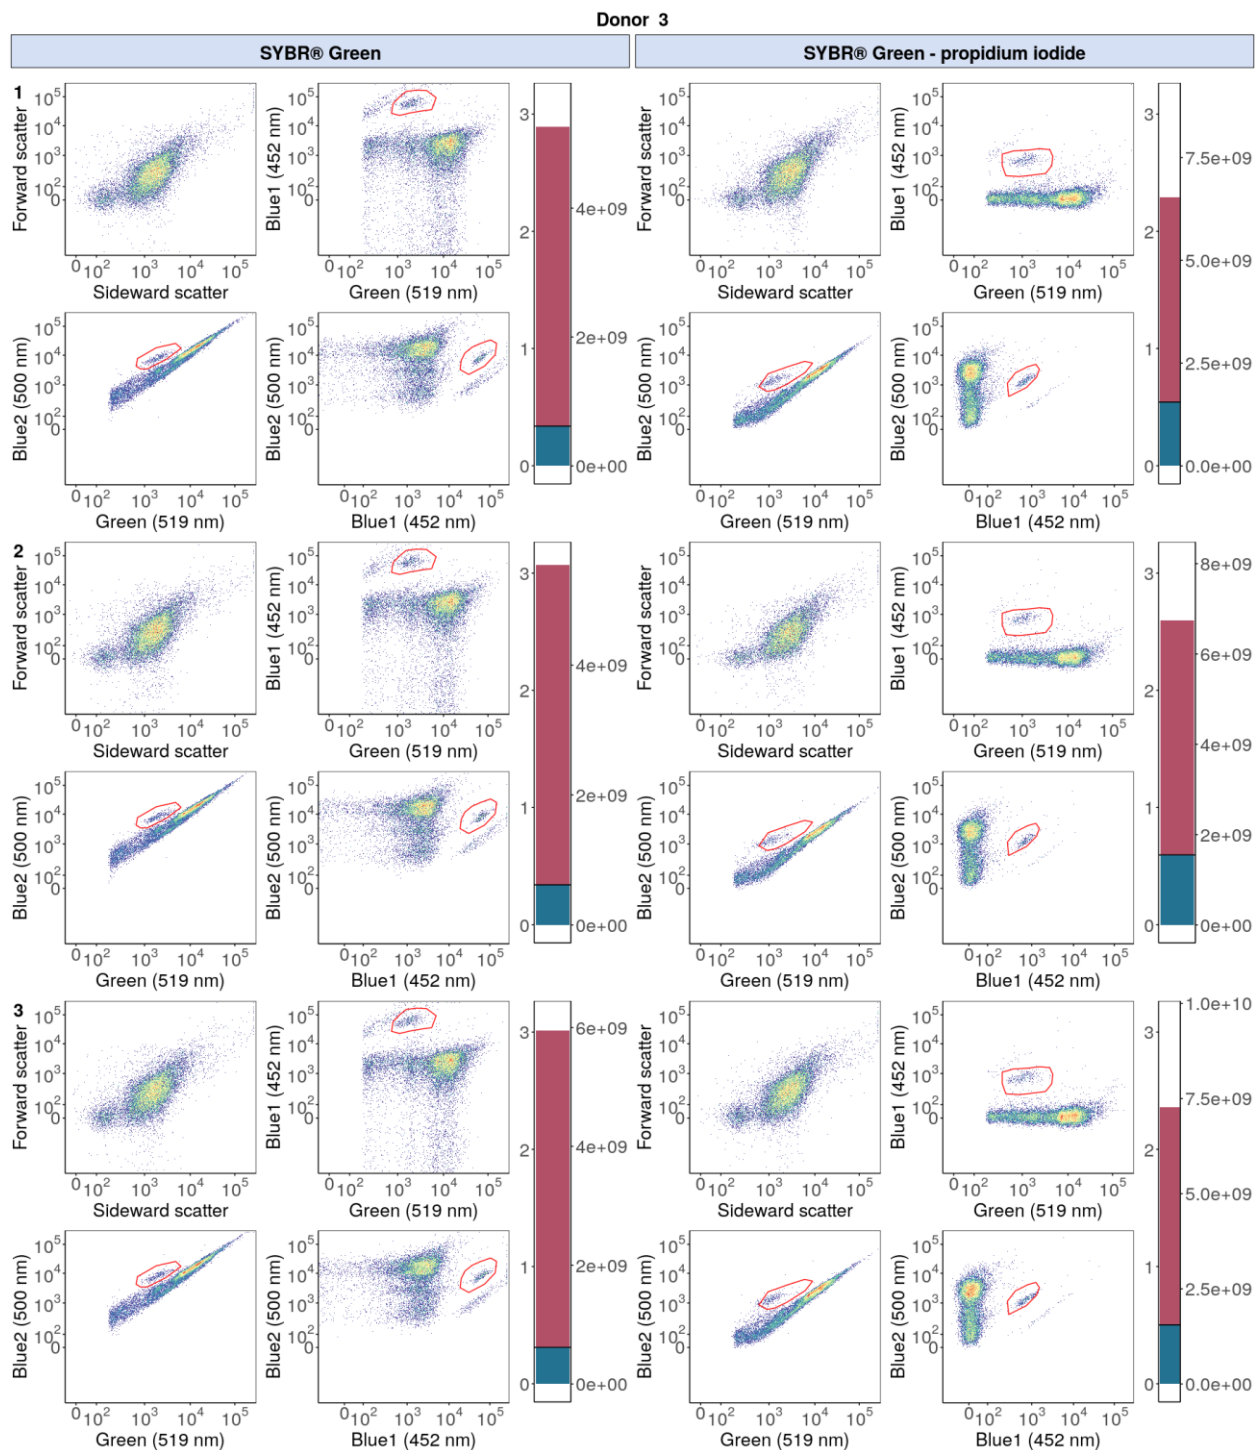

Figure S1 - continued: Visualisation of cofactor  $F_{420}$  auto fluorescence (gated in red) in Blue1 (452 nm) and Blue2 (500 nm) fluorescence channels as a function of the Green (519 nm) fluorescence channels, Blue2 fluorescence as a function of the Blue1 fluorescence channels and the microbial community visualisation in the forward scatter as a function of the sideways scatter channels of technical replicates of a faecal sample derived from donor 3. The replicates were stained with either SYBR® Green (left) or a SYBR® Green – propidium iodide staining mix (right). The proportional (left y-axis) and absolute (right y-axis) cell counts are depicted as a bar chart on the right, with the detected methanogen population in the filtered sample depicted as a horizontal line. The absolute methanogen population below and above the filtered sample population is depicted in blue and red, respectively.

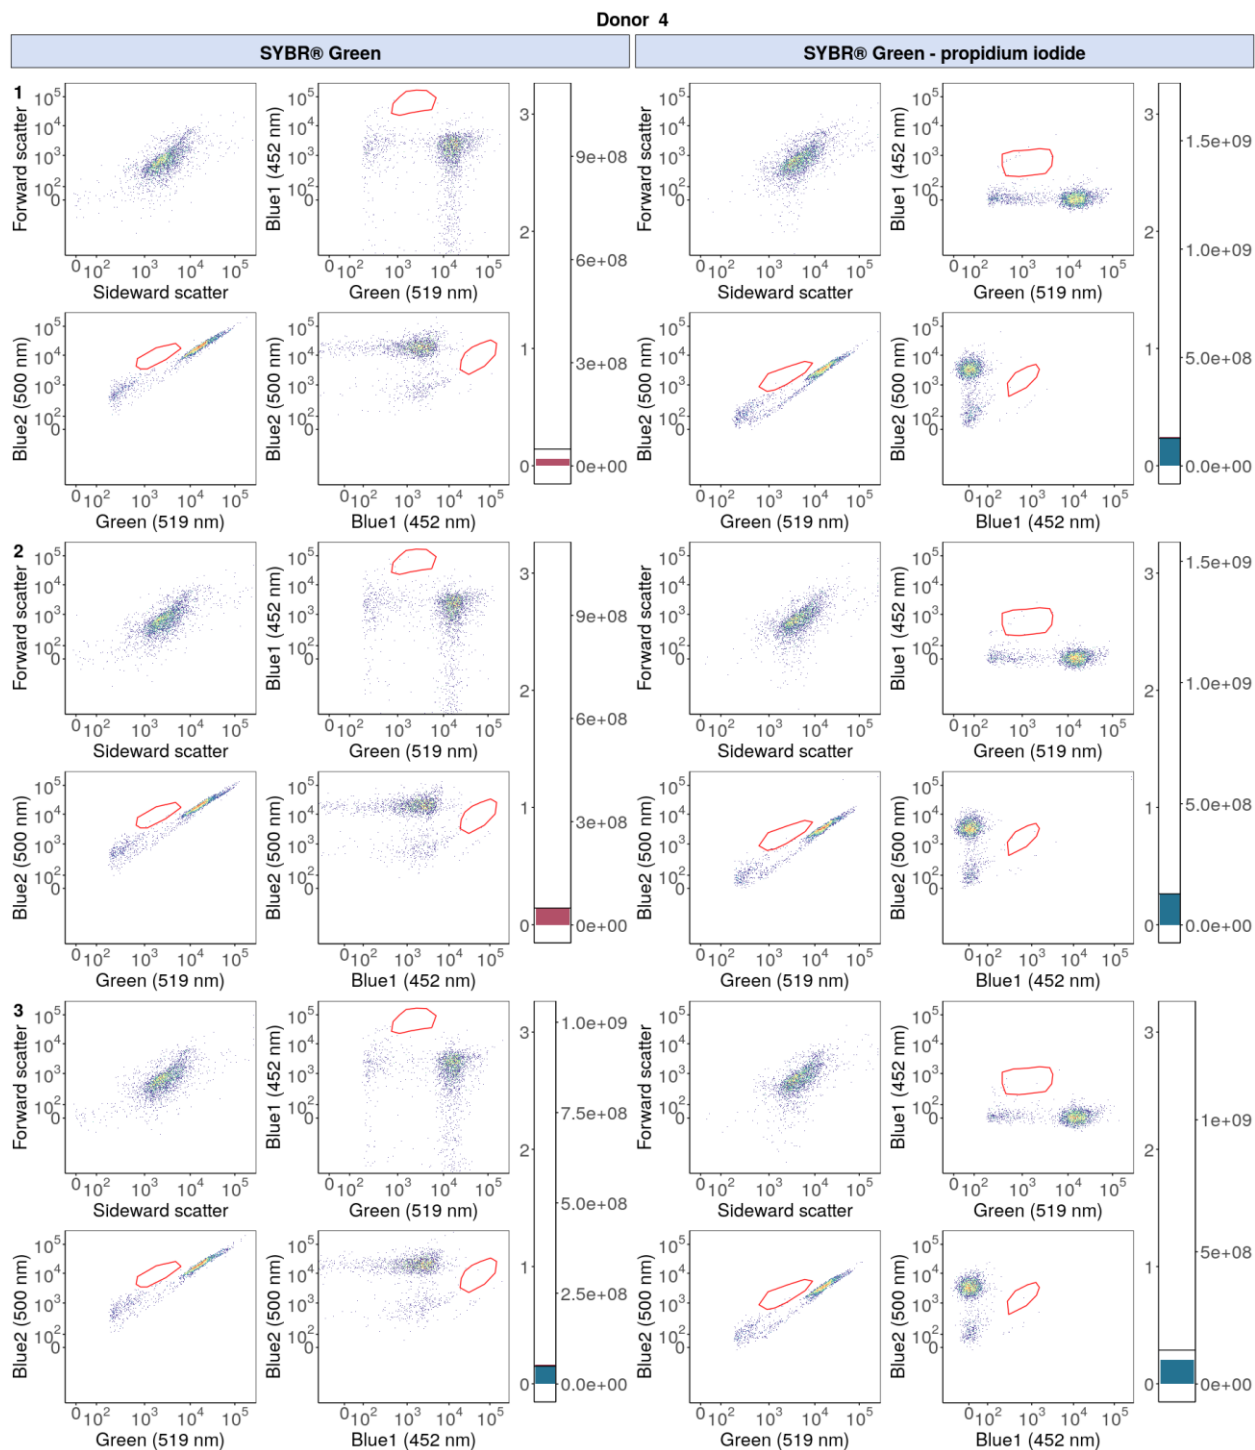

Figure S1 - continued: Visualisation of cofactor  $F_{420}$  auto fluorescence (gated in red) in Blue1 (452 nm) and Blue2 (500 nm) fluorescence channels as a function of the Green (519 nm) fluorescence channels, Blue2 fluorescence as a function of the Blue1 fluorescence channels and the microbial community visualisation in the forward scatter as a function of the sideways scatter channels of technical replicates of a faecal sample derived from donor 4. The replicates were stained with either SYBR® Green (left) or a SYBR® Green – propidium iodide staining mix (right). The proportional (left y-axis) and absolute (right y-axis) cell counts are depicted as a bar chart on the right, with the detected methanogen population in the filtered sample depicted as a horizontal line. The absolute methanogen population below and above the filtered sample population is depicted in blue and red, respectively.



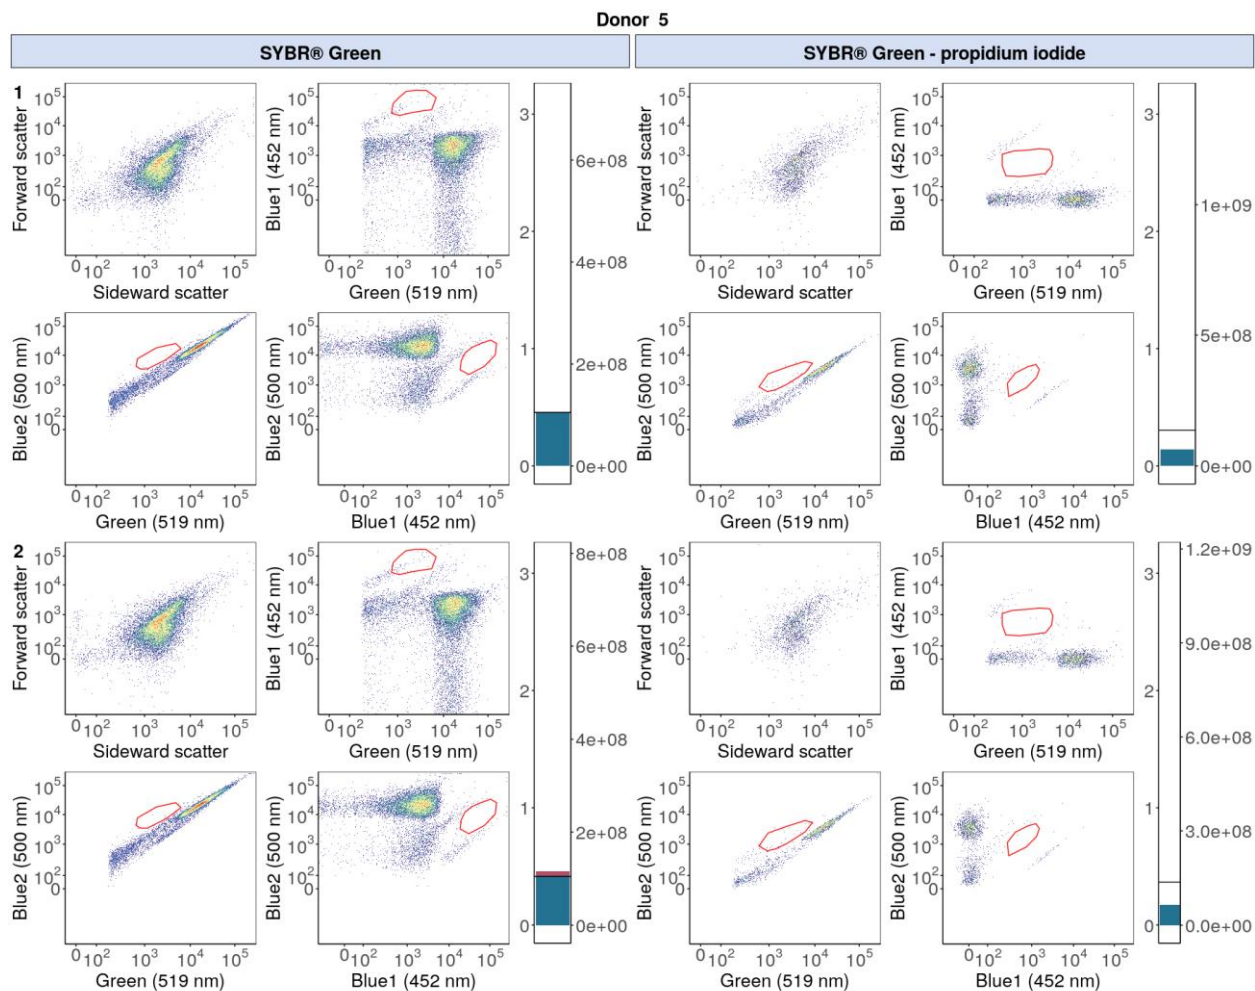

Figure S1 - continued: Visualisation of cofactor  $F_{420}$  auto fluorescence (gated in red) in Blue1 (452 nm) and Blue2 (500 nm) fluorescence channels as a function of the Green (519 nm) fluorescence channels, Blue2 fluorescence as a function of the Blue1 fluorescence channels and the microbial community visualisation in the forward scatter as a function of the sideways scatter channels of technical replicates of a faecal sample derived from donor 5. The replicates were stained with either SYBR® Green (left) or a SYBR® Green – propidium iodide staining mix (right). The proportional (left y-axis) and absolute (right y-axis) cell counts are depicted as a bar chart on the right, with the detected methanogen population in the filtered sample depicted as a horizontal line. The absolute methanogen population below and above the filtered sample population is depicted in blue and red, respectively.

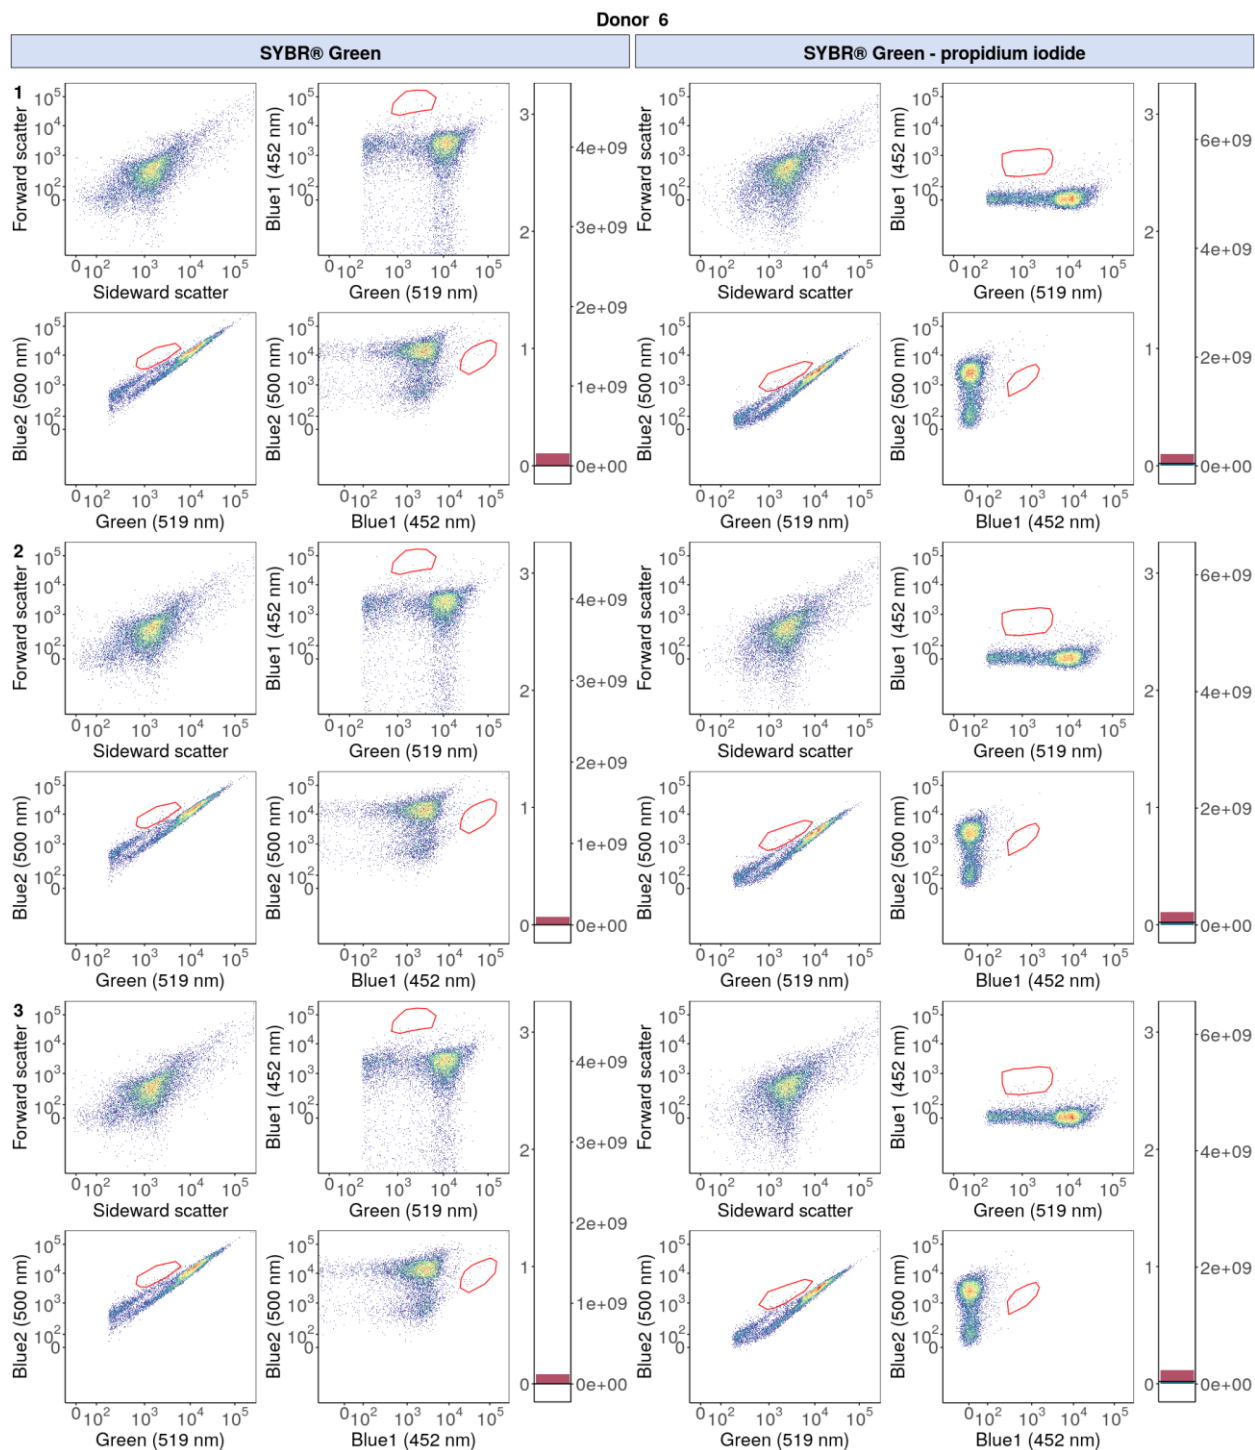

Figure S1 - continued: Visualisation of cofactor  $F_{420}$  auto fluorescence (gated in red) in Blue1 (452 nm) and Blue2 (500 nm) fluorescence channels as a function of the Green (519 nm) fluorescence channels, Blue2 fluorescence as a function of the Blue1 fluorescence channels and the microbial community visualisation in the forward scatter as a function of the sideways scatter channels of technical replicates of a faecal sample derived from donor 6. The replicates were stained with either SYBR® Green (left) or a SYBR® Green – propidium iodide staining mix (right). The proportional (left y-axis) and absolute (right y-axis) cell counts are depicted as a bar chart on the right, with the detected methanogen population in the filtered sample depicted as a horizontal line. The absolute methanogen population below and above the filtered sample population is depicted in blue and red, respectively.

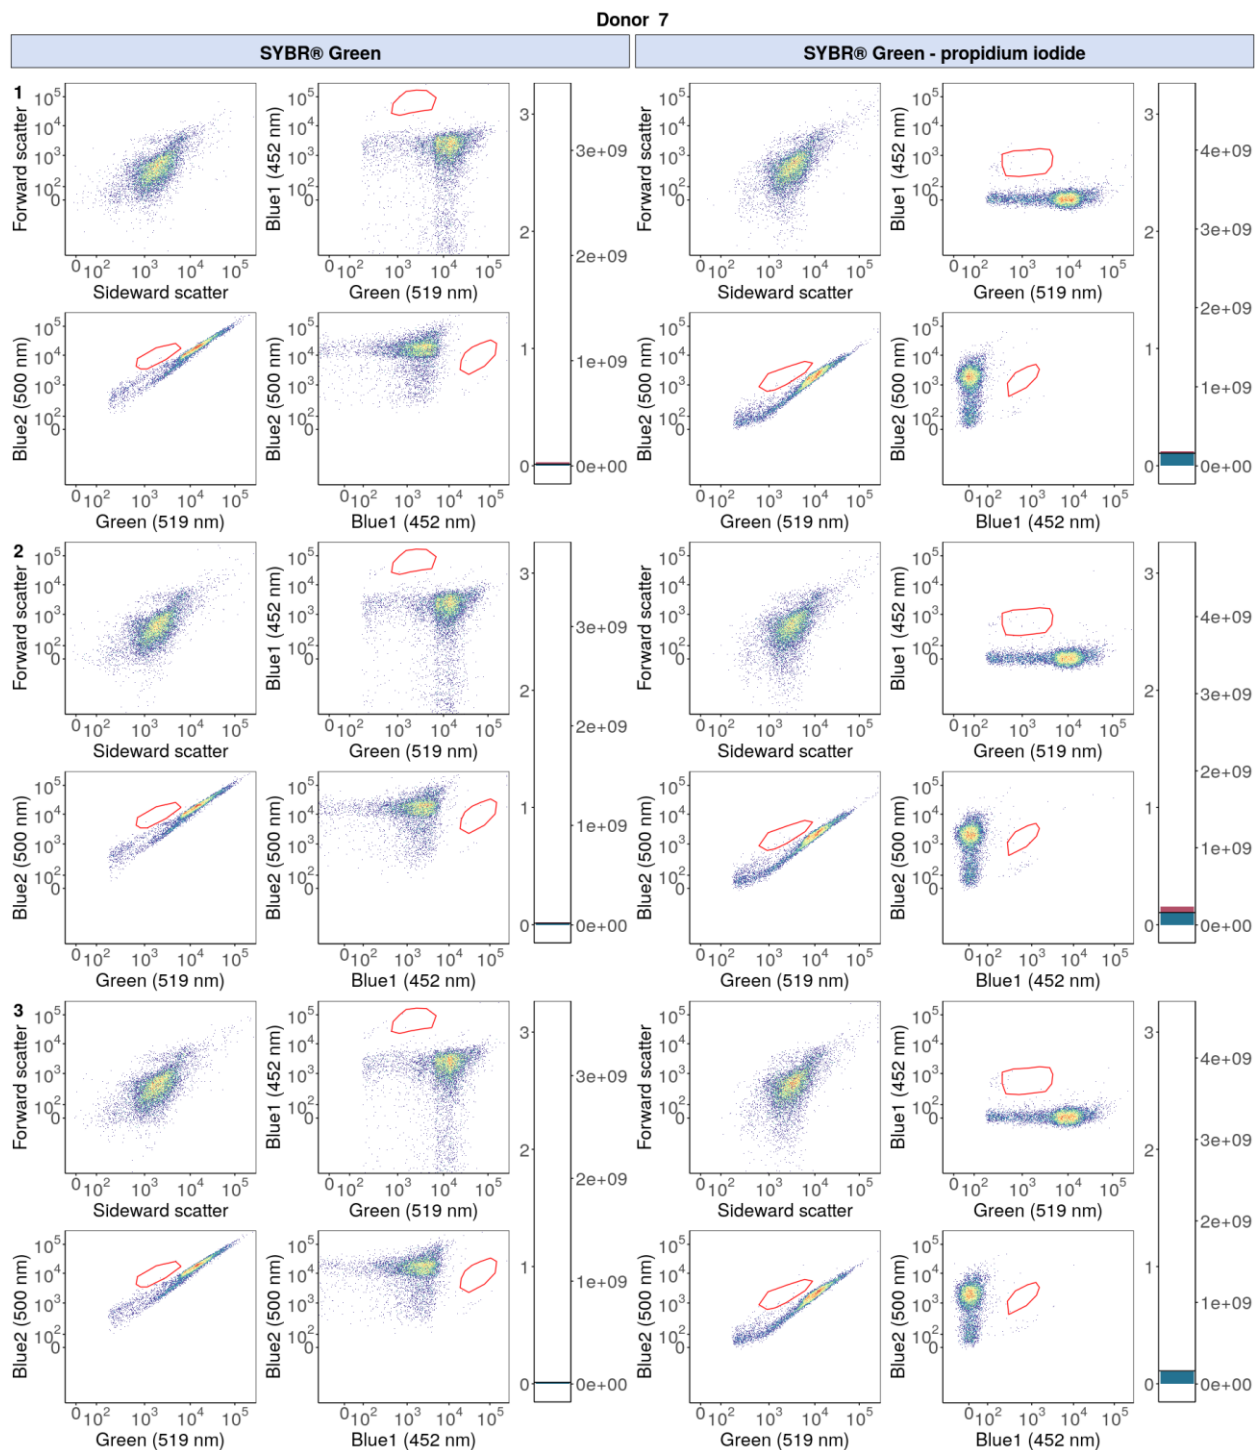

Figure S1 - continued: Visualisation of cofactor  $F_{420}$  auto fluorescence (gated in red) in Blue1 (452 nm) and Blue2 (500 nm) fluorescence channels as a function of the Green (519 nm) fluorescence channels, Blue2 fluorescence as a function of the Blue1 fluorescence channels and the microbial community visualisation in the forward scatter as a function of the sideways scatter channels of technical replicates of a faecal sample derived from donor 7. The replicates were stained with either SYBR® Green (left) or a SYBR® Green – propidium iodide staining mix (right). The proportional (left y-axis) and absolute (right y-axis) cell counts are depicted as a bar chart on the right, with the detected methanogen population in the filtered sample depicted as a horizontal line. The absolute methanogen population below and above the filtered sample population is depicted in blue and red, respectively.



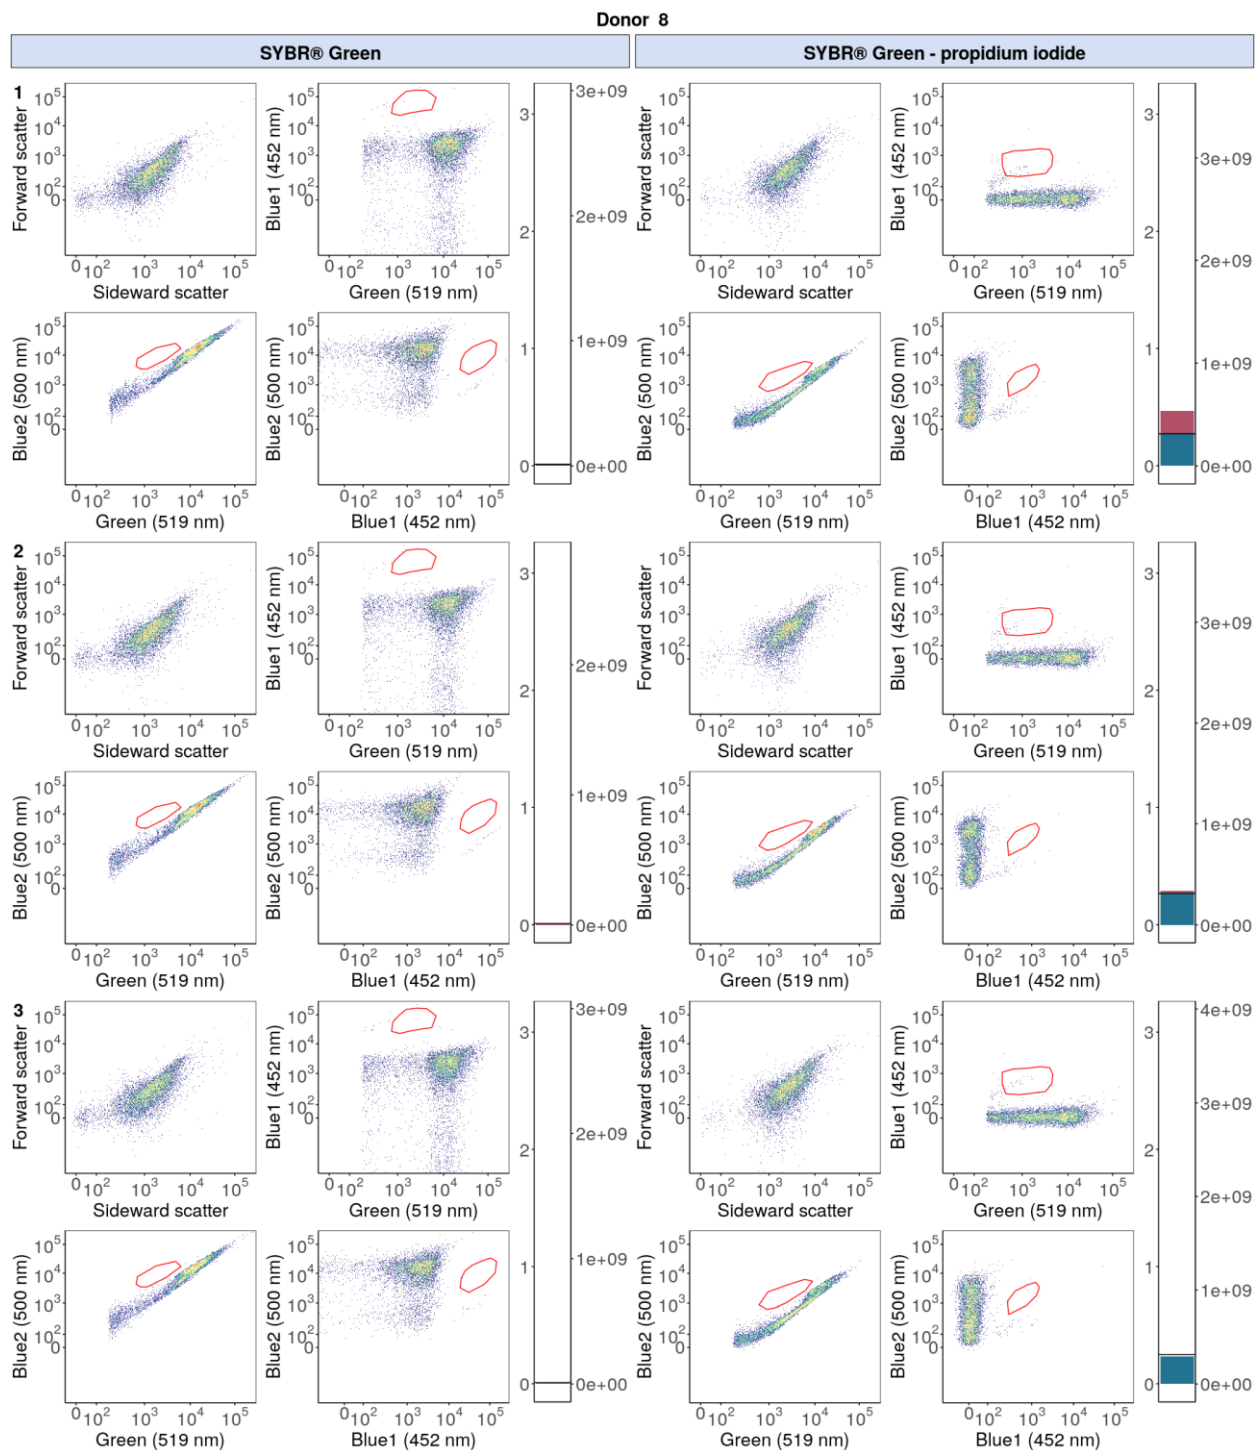

Figure S1 - continued: Visualisation of cofactor  $F_{420}$  auto fluorescence (gated in red) in Blue1 (452 nm) and Blue2 (500 nm) fluorescence channels as a function of the Green (519 nm) fluorescence channels, Blue2 fluorescence as a function of the Blue1 fluorescence channels and the microbial community visualisation in the forward scatter as a function of the sideways scatter channels of technical replicates of a faecal sample derived from donor 8. The replicates were stained with either SYBR® Green (left) or a SYBR® Green – propidium iodide staining mix (right). The proportional (left y-axis) and absolute (right y-axis) cell counts are depicted as a bar chart on the right, with the detected methanogen population in the filtered sample depicted as a horizontal line. The absolute methanogen population below and above the filtered sample population is depicted in blue and red, respectively.

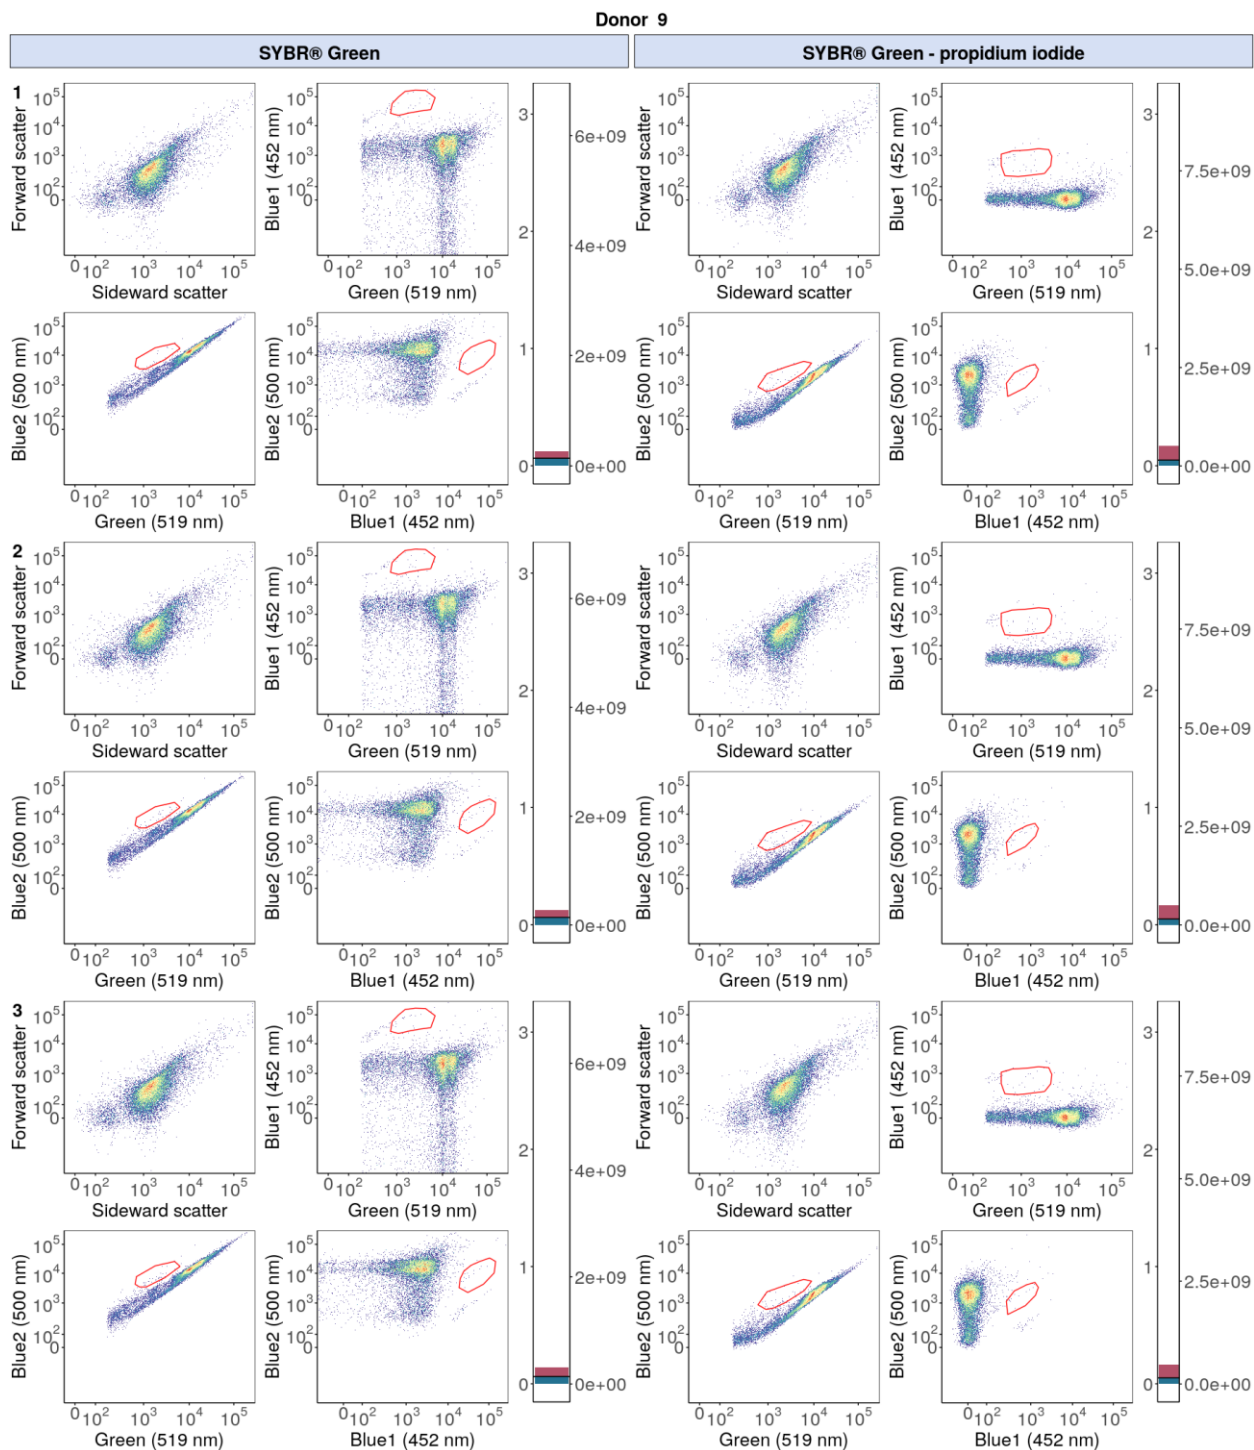

Figure S1 - continued: Visualisation of cofactor  $F_{420}$  auto fluorescence (gated in red) in Blue1 (452 nm) and Blue2 (500 nm) fluorescence channels as a function of the Green (519 nm) fluorescence channels, Blue2 fluorescence as a function of the Blue1 fluorescence channels and the microbial community visualisation in the forward scatter as a function of the sideways scatter channels of technical replicates of a faecal sample derived from donor 9. The replicates were stained with either SYBR® Green (left) or a SYBR® Green – propidium iodide staining mix (right). The proportional (left y-axis) and absolute (right y-axis) cell counts are depicted as a bar chart on the right, with the detected methanogen population in the filtered sample depicted as a horizontal line. The absolute methanogen population below and above the filtered sample population is depicted in blue and red, respectively.

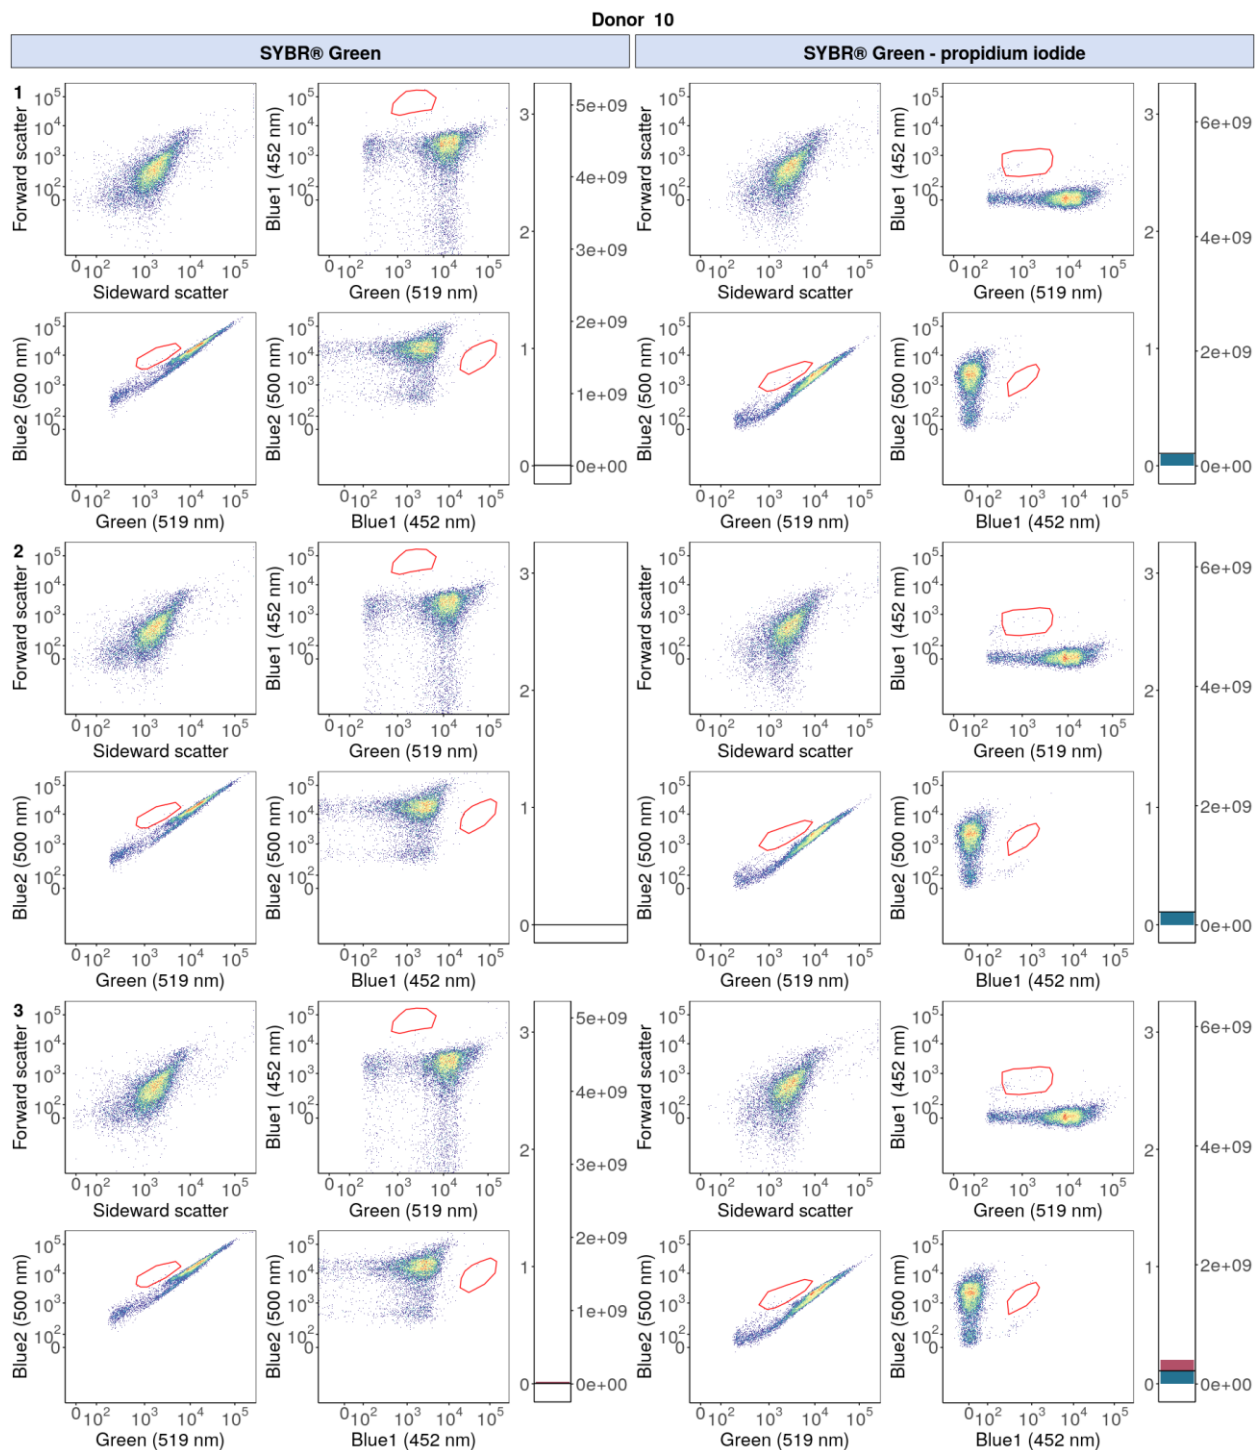

Figure S1 - continued: Visualisation of cofactor  $F_{420}$  auto fluorescence (gated in red) in Blue1 (452 nm) and Blue2 (500 nm) fluorescence channels as a function of the Green (519 nm) fluorescence channels, Blue2 fluorescence as a function of the Blue1 fluorescence channels and the microbial community visualisation in the forward scatter as a function of the sideways scatter channels of technical replicates of a faecal sample derived from donor 10. The replicates were stained with either SYBR® Green (left) or a SYBR® Green – propidium iodide staining mix (right). The proportional (left y-axis) and absolute (right y-axis) cell counts are depicted as a bar chart on the right, with the detected methanogen population in the filtered sample depicted as a horizontal line. The absolute methanogen population below and above the filtered sample population is depicted in blue and red, respectively.

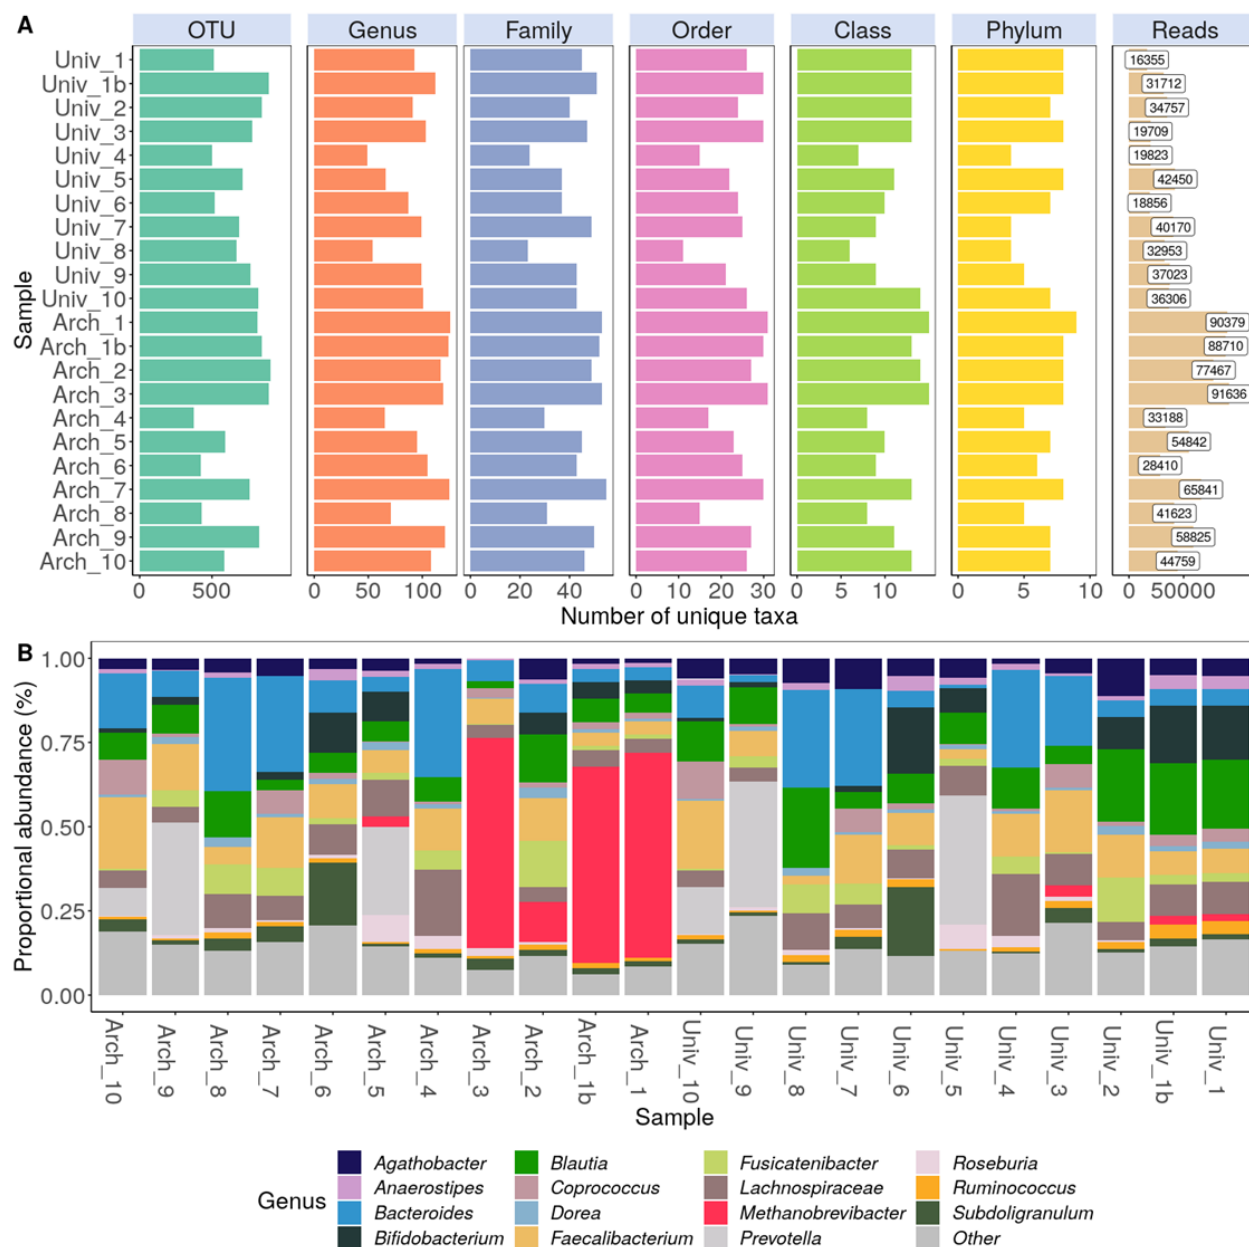

Figure S2: **(A)** Number of unique taxa in the 16S rRNA gene amplicon sequencing samples. **(B)** Proportional abundance (%) of the 15 most abundant genera in all samples. Less abundant genera are pooled into “Other”. The V3-V4 region of 16S rRNA gene was amplified with either universal (Univ, U341F – U806) or Archaeal (Arch, 340F – 1000R, nested with U341F – U806R) primers. Higher level taxa are to be interpreted as unclassified genus belonging to the respective taxon.



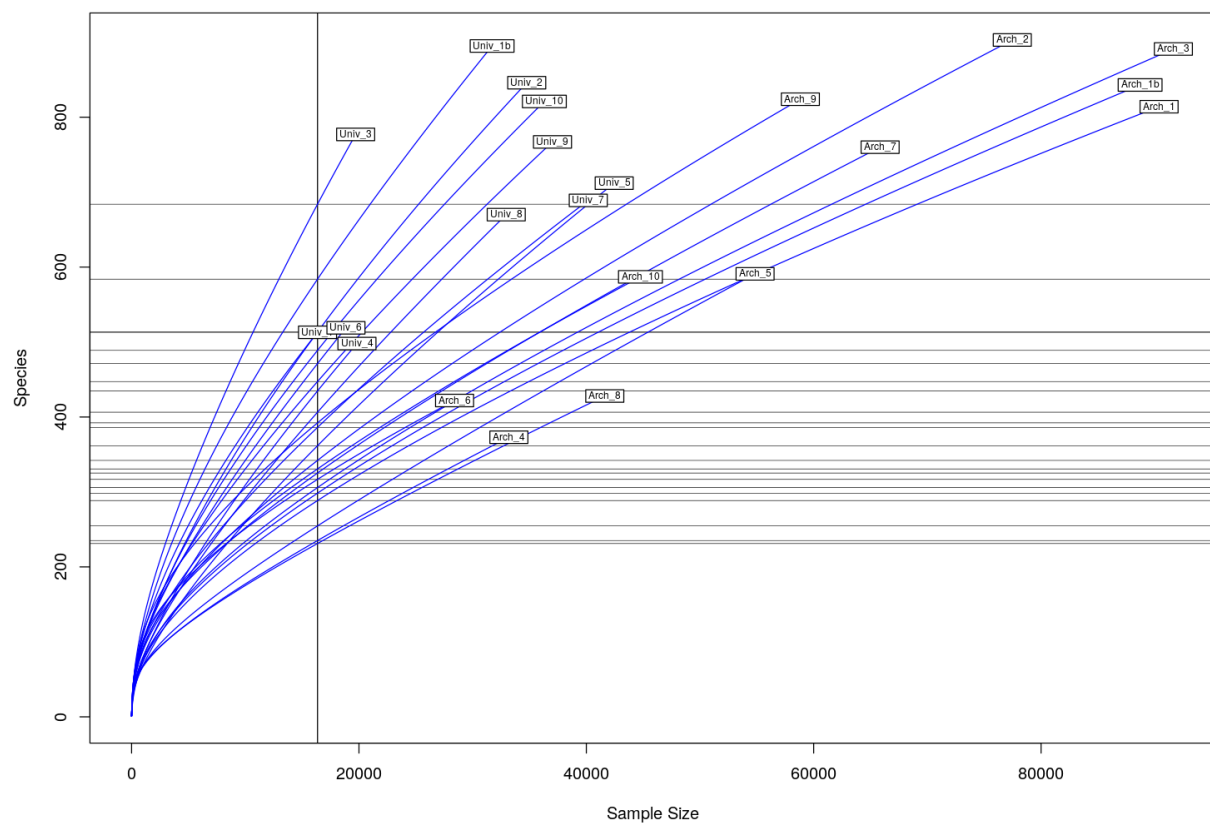

Figure S3: Rarefaction curves of 16S rRNA gene sequence count data. The V3-V4 region of 16S rRNA gene was amplified with either universal (Univ, U341F – U806) or Archaeal (Arch, 340F – 1000R, nested with U341F – U806R) primers. The raw data corresponding to the sample identifiers can be found in the EBI ENA submission (ERP138722).

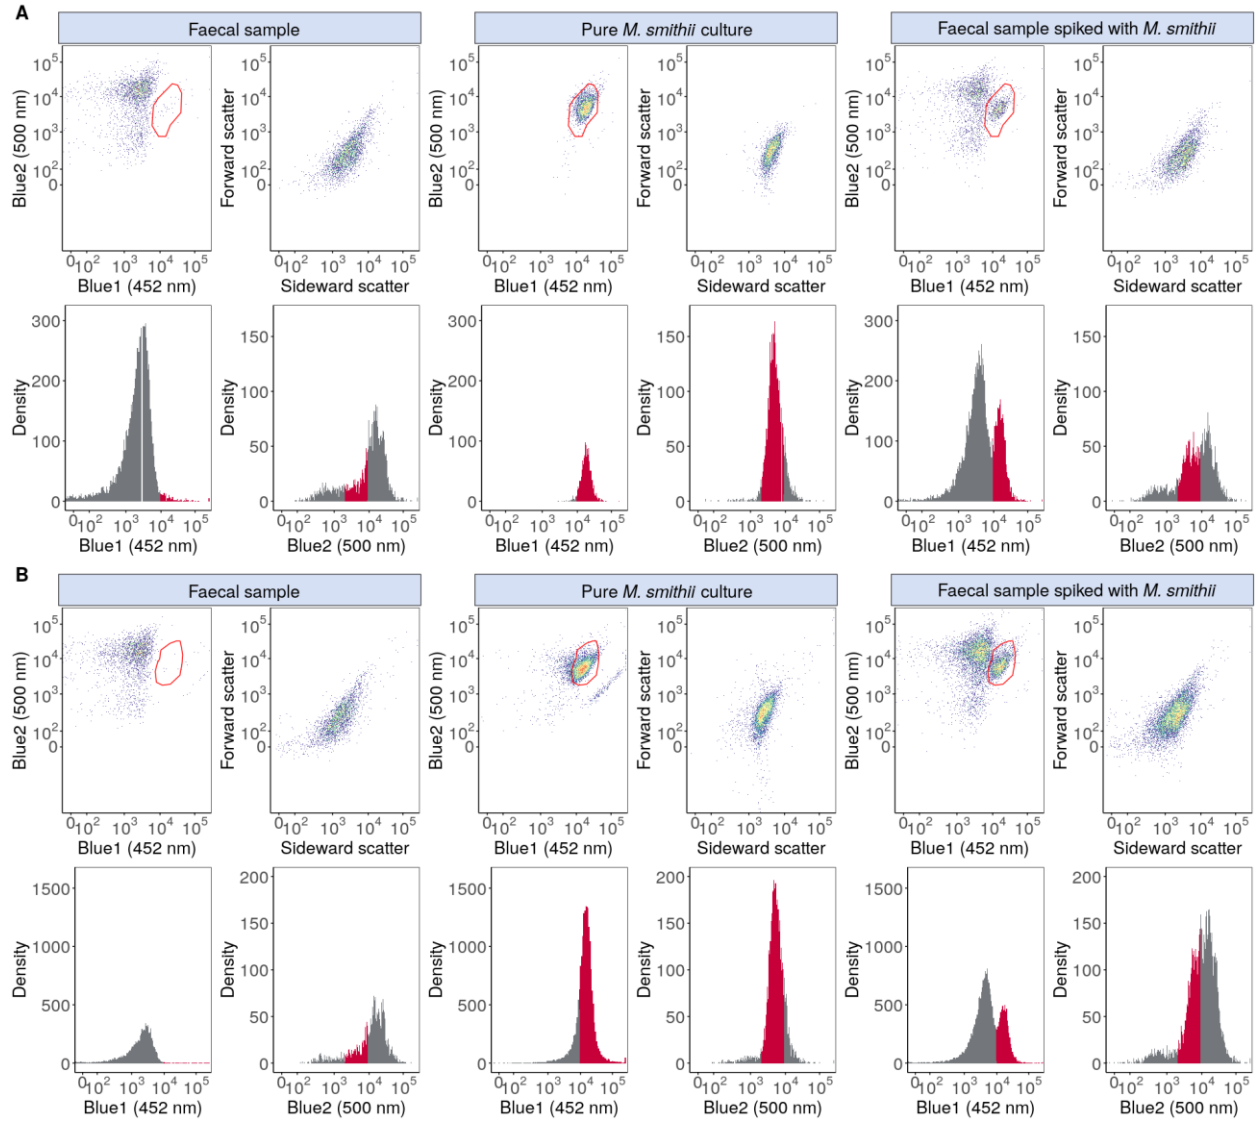

Figure S4: Flow cytometric visualisation and gating of the cofactor F<sub>420</sub> auto fluorescence (gated in red) in the Blue2 (500 nm) fluorescence channel as a function of the Blue1 (452 nm) fluorescence channel and community visualisation in the forward scatter channel in function of the sideward scatter channel. The one-dimensional histograms of the 452 and 500 nm emissions are depicted below the density plots with the F<sub>420</sub> auto fluorescence peaks in red. The samples were stained with either SYBR® Green – propidium iodide (**A**) or SYBR® Green (**B**), of a faecal sample, pure *M. smithii* culture and faecal sample spiked with *M. smithii*.

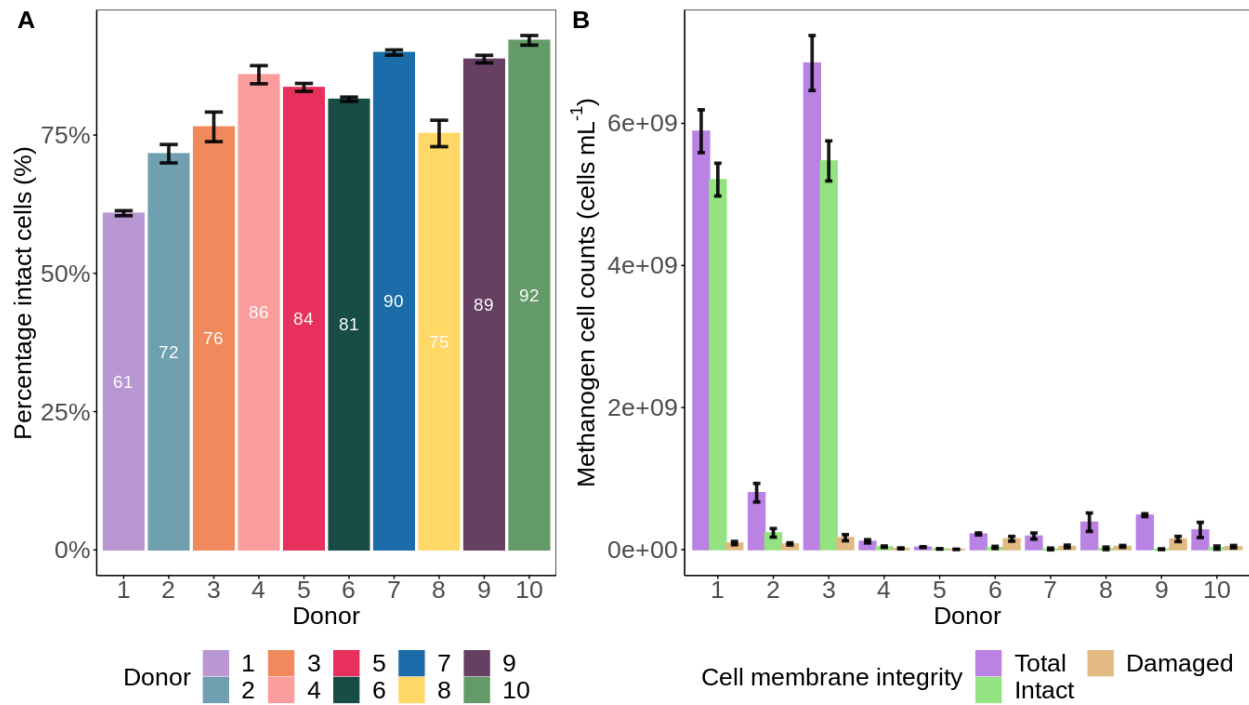

Figure S5: **(A)** The total percentage of intact cells. Methanogen cell counts **(B)** of all samples stained with Sybr Green – Propidium iodide (purple), and its subsequent intact fraction (green) and damaged fraction (orange).

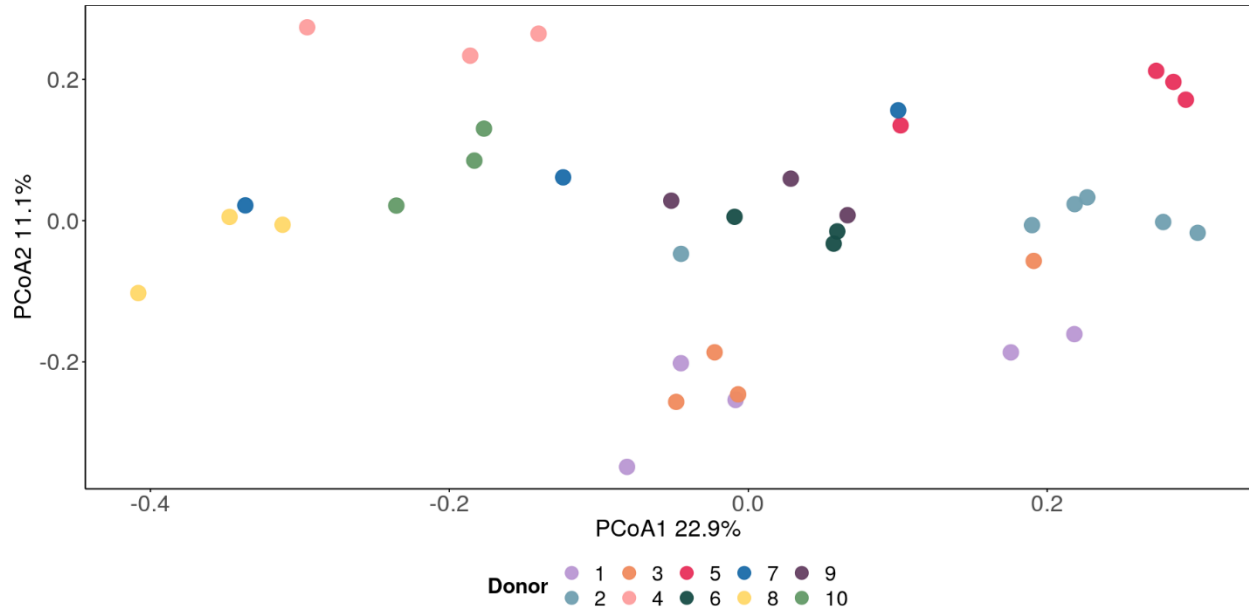

Figure S6: Community  $\beta$  diversity assessment of the flow cytometric fingerprint data of all cellular information based on six phenotypic parameters (4 fluorescence and 2 scatter signals), stained with SYBR<sup>®</sup> Green. Ordination was performed with principal coordinates analysis (PCoA) based on Bray-Curtis dissimilarity.

Table S1: Components of DMSZ medium 1523. Modified *Methanobacterium* medium (DSMZ, 2015).

| Component                               | Weight  | Unit | Conc (g <sup>L</sup> <sup>-1</sup> ) | Conc (mM) |
|-----------------------------------------|---------|------|--------------------------------------|-----------|
| KH <sub>2</sub> PO <sub>4</sub>         | 0.50    | g    | 0.50                                 | 3.67      |
| MgSO <sub>4</sub> x 7 H <sub>2</sub> O  | 0.40    | g    | 0.40                                 | 1.62      |
| NaCl                                    | 0.40    | g    | 0.40                                 | 6.85      |
| NH <sub>4</sub> Cl                      | 0.40    | g    | 0.40                                 | 7.48      |
| CaCl <sub>2</sub> x 2 H <sub>2</sub> O  | 0.05    | g    | 0.05                                 | 0.34      |
| Trace element solution SL-10 (Table S2) | 1.00    | mL   | -                                    | -         |
| Brain Heart Infusion                    | 6.00    | g    | 6.00                                 | -         |
| Proteose peptone                        | 6.00    | g    | 6.00                                 | -         |
| Yeast extract                           | 2.00    | g    | 2.00                                 | -         |
| Na-acetate                              | 1.00    | g    | 1.00                                 | 12.19     |
| Na-formate                              | 2.00    | g    | 2.00                                 | 29.41     |
| Na-resazurin solution (0.1% w/v)        | 0.50    | mL   | 5.00E-4                              | -         |
| NaHCO <sub>3</sub>                      | 4.00    | g    | 4.00                                 | 47.62     |
| Vitamins solution (Table S3)            | 1.00    | mL   | -                                    | -         |
| L-Cysteine-HCl x H <sub>2</sub> O       | 0.50    | g    | 0.50                                 | 2.85      |
| Na <sub>2</sub> S x 9 H <sub>2</sub> O  | 0.50    | g    | 0.50                                 | 2.08      |
| Distilled water                         | 1000.00 | mL   | -                                    | -         |

Table S2: Components of trace element solution SL-10, derived from DSMZ medium 320 [2].

| Component                                             | Weight | Unit | Conc (g <sup>L</sup> <sup>-1</sup> ) | Conc (mM) |
|-------------------------------------------------------|--------|------|--------------------------------------|-----------|
| HCl (25%; 7.7 M)                                      | 10.00  | mL   | 2.50                                 | 68.57     |
| FeCl <sub>2</sub> x 4 H <sub>2</sub> O                | 1.50   | g    | 1.50                                 | 7.55      |
| ZnCl <sub>2</sub>                                     | 70.00  | mg   | 0.07                                 | 0.51      |
| MnCl <sub>2</sub> x 4 H <sub>2</sub> O                | 100.00 | mg   | 0.10                                 | 0.51      |
| H <sub>3</sub> BO <sub>3</sub>                        | 6.00   | mg   | 0.01                                 | 0.10      |
| CoCl <sub>2</sub> x 6 H <sub>2</sub> O                | 190.00 | mg   | 0.19                                 | 1.46      |
| CuCl <sub>2</sub> x 2 H <sub>2</sub> O                | 2.00   | mg   | 0.002                                | 0.01      |
| NiCl <sub>2</sub> x 6 H <sub>2</sub> O                | 24.00  | mg   | 0.02                                 | 0.19      |
| Na <sub>2</sub> MoO <sub>4</sub> x 2 H <sub>2</sub> O | 36.00  | mg   | 0.04                                 | 0.15      |
| Distilled water                                       | 990.00 | mL   | -                                    | -         |



Table S3: Components in the seven vitamins solution, derived from DSMZ medium 503 [3]

| <b>Component</b>                  | <b>Weight</b> | <b>Unit</b> | <b>Conc (gL<sup>-1</sup>)</b> | <b>Conc (mM)</b> |
|-----------------------------------|---------------|-------------|-------------------------------|------------------|
| Vitamin B12                       | 100.00        | mg          | 0.10                          | 0.07             |
| p-Aminobenzoic acid               | 80.00         | mg          | 0.08                          | 0.58             |
| D(+)-Biotin                       | 20.00         | mg          | 0.02                          | 0.08             |
| Nicotinic acid                    | 200.00        | mg          | 0.20                          | 1.63             |
| Calcium pantothenate              | 100.00        | mg          | 0.10                          | 0.21             |
| Pyridoxine hydrochloride          | 300.00        | mg          | 0.30                          | 1.46             |
| Thiamine-HCl x 2 H <sub>2</sub> O | 200.00        | mg          | 0.20                          | 0.54             |
| Distilled water                   | 1000.00       | mL          | -                             | -                |

Table S4: Reducing anaerobic phosphate buffer (pH 6.8) was sparged and flushed with N<sub>2</sub>-gas prior to autoclaving.

| <b>Component</b>                                 | <b>Composition (g L<sup>-1</sup>)</b> | <b>Molar conc. (mM)</b> | <b>Manufacturer</b>               |
|--------------------------------------------------|---------------------------------------|-------------------------|-----------------------------------|
| L-Cystein- HCl                                   | 1.00                                  | 6.34e-3                 | J&K Scientific, Lommel, Belgium   |
| C <sub>2</sub> H <sub>3</sub> O <sub>2</sub> SNa | 1.00                                  | 8.75e-3                 | Sigma Aldrich, St. Louis, MO, USA |
| NaHCO <sub>3</sub>                               | 1.40                                  | 2.40e-2                 | Chem-lab, Zedelgem, Belgium       |
| NaCl                                             | 0.90                                  | 1.07e-2                 | Carl Roth, Karlsruhe, Germany     |
| KH <sub>2</sub> PO <sub>4</sub>                  | 6.80                                  | 5.00e-2                 | Carl Roth, Karlsruhe, Germany     |
| K <sub>2</sub> HPO <sub>4</sub>                  | 8.72                                  | 5.00e-2                 | Carl Roth, Karlsruhe, Germany     |

Table S5: Classification measures (accuracy, P-value, sensitivity, specificity, precision, F1-score and positive and negative predictive values) of the methanogen classification method on ten faecal samples, stained with either SGPI or SG, as verified with 16S rRNA gene amplicon (16S) Archaea abundances, sequenced with either universal or Archaeal primers. Methanogen classifications were marked as positive when methanogen cell counts were higher than both the sum of the average, sample wide, filtered background noise and standard deviation, and the sample specific filtered background noise.

| 16S primer | Stain | Accuracy | P-value | Sensitivity | Specificity | Precision | F1   | Pos. Pred. Value | Neg. Pred. Value |
|------------|-------|----------|---------|-------------|-------------|-----------|------|------------------|------------------|
| Universal  | SGPI  | 1.00     | 0.11    | 1.00        | 1.00        | 1.00      | 1.00 | 1.00             | 1.00             |
| Universal  | SG    | 0.90     | 0.38    | 1.00        | 0.88        | 0.67      | 0.80 | 1.00             | 0.67             |
| Archaeal   | SGPI  | 0.80     | 0.17    | 0.50        | 1.00        | 1.00      | 0.67 | 1.00             | 0.75             |
| Archaeal   | SG    | 0.90     | 0.05    | 0.75        | 1.00        | 1.00      | 0.86 | 1.00             | 0.86             |

Table S6: Confusion matrices of the predicted methanogen classification method (FCM) on ten faecal samples, stained with either SGPI or SG, as verified with 16S rRNA gene amplicon (16S) Archaea abundances, sequenced with either universal or Archaeal primers. Methanogen classifications were marked as positive when methanogen cell counts were higher than both the sum of the average, sample wide, filtered background noise and standard deviation, and the sample specific filtered background noise.

|                          |                | 16S - Universal Reference |                |                        |                | 16S - Universal Reference |                |
|--------------------------|----------------|---------------------------|----------------|------------------------|----------------|---------------------------|----------------|
|                          |                | Methanogen                | Non Methanogen |                        |                | Methanogen                | Non Methanogen |
| FCM - SGPI<br>Prediction | Methanogen     | 2                         | 0              | FCM - SG<br>Prediction | Methanogen     | 2                         | 0              |
|                          | Non methanogen | 0                         | 8              |                        | Non methanogen | 1                         | 7              |
|                          |                | 16S - Archaeal Reference  |                |                        |                | 16S - Archaeal Reference  |                |
|                          |                | Methanogen                | Non Methanogen |                        |                | Methanogen                | Non Methanogen |
| FCM - SGPI<br>Prediction | Methanogen     | 2                         | 0              | FCM - SG<br>Prediction | Methanogen     | 3                         | 0              |
|                          | Non methanogen | 2                         | 6              |                        | Non methanogen | 1                         | 6              |

Table S7: Classification measures (A) (accuracy, P-value, sensitivity, specificity, precision, F1-score and positive and negative predictive values) and confusion matrix (B) of the predicted methanogen classification method (FCM) on 241 SHIME samples, stained with SGPI and verified with the presence of methane (CH<sub>4</sub>) in SHIME headspace and the presence of methanogenic Archaea. Methanogen classifications were marked as positive when methanogen cell counts were higher than the average, sample wide, filtered background noise and standard deviation.

| <b>A</b> | <b>Reference</b>           | <b>Accuracy</b> | <b>P-value</b> | <b>Sensitivity</b> | <b>Specificity</b> | <b>Precision</b> | <b>F1-score</b> | <b>Pos Pred Value</b> | <b>Neg Pred Value</b> |
|----------|----------------------------|-----------------|----------------|--------------------|--------------------|------------------|-----------------|-----------------------|-----------------------|
|          | CH <sub>4</sub> production | 0.71            | 0.98           | 0.65               | 0.72               | 0.42             | 0.51            | 0.42                  | 0.87                  |
|          | Archaea                    | 0.75            | 7.57E-07       | 0.65               | 0.82               | 0.70             | 0.67            | 0.70                  | 0.78                  |

| <b>B</b>                 |                | CH <sub>4</sub> detected reference |                |                          |                |    |     | Archaea detected reference |                |
|--------------------------|----------------|------------------------------------|----------------|--------------------------|----------------|----|-----|----------------------------|----------------|
|                          |                | Methanogen                         | Non Methanogen |                          |                |    |     | Methanogen                 | Non Methanogen |
| FCM - SGPI<br>Prediction | Methanogen     | 37                                 | 51             | FCM - SGPI<br>Prediction | Methanogen     | 62 | 26  |                            |                |
|                          | Non methanogen | 20                                 | 133            |                          | Non methanogen | 34 | 119 |                            |                |
